# Supplementary material
Source: Springer Nature journal article supplement (https://www.springermedizin.de/resource/supplementary/12889_2012_5478_MOESM1_ESM.pdf/9495448)

## Education

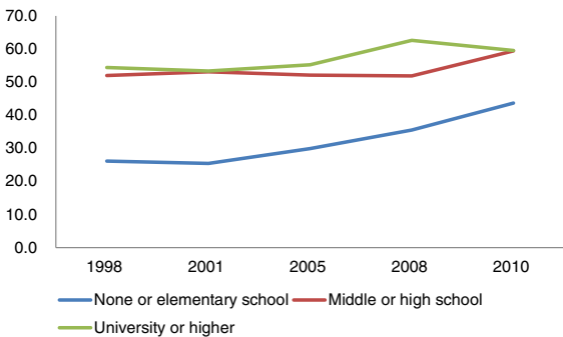

## Household income

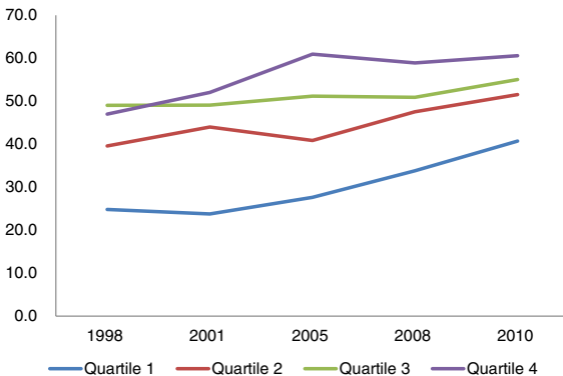

## Occupation

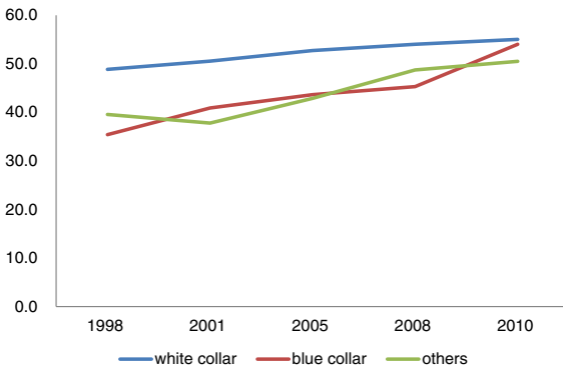

Supplement: MOESM1 [file 9495448]
